# Supplementary material for: Early-Stage Breast Cancer Detection in Breast Milk
Source: PubMed Central journal article supplement — Cancer Discov. 2023 Sep 14;13(10):2180–91. doi: 10.1158/2159-8290.CD-22-1340 (PMC10551665; doi:10.1158/2159-8290.cd-22-1340), 2023-09-14
Supplement: cd-22-1340_figure_s3_suppsf3.pdf [file cd-22-1340_figure_s3_suppsf3.pdf]

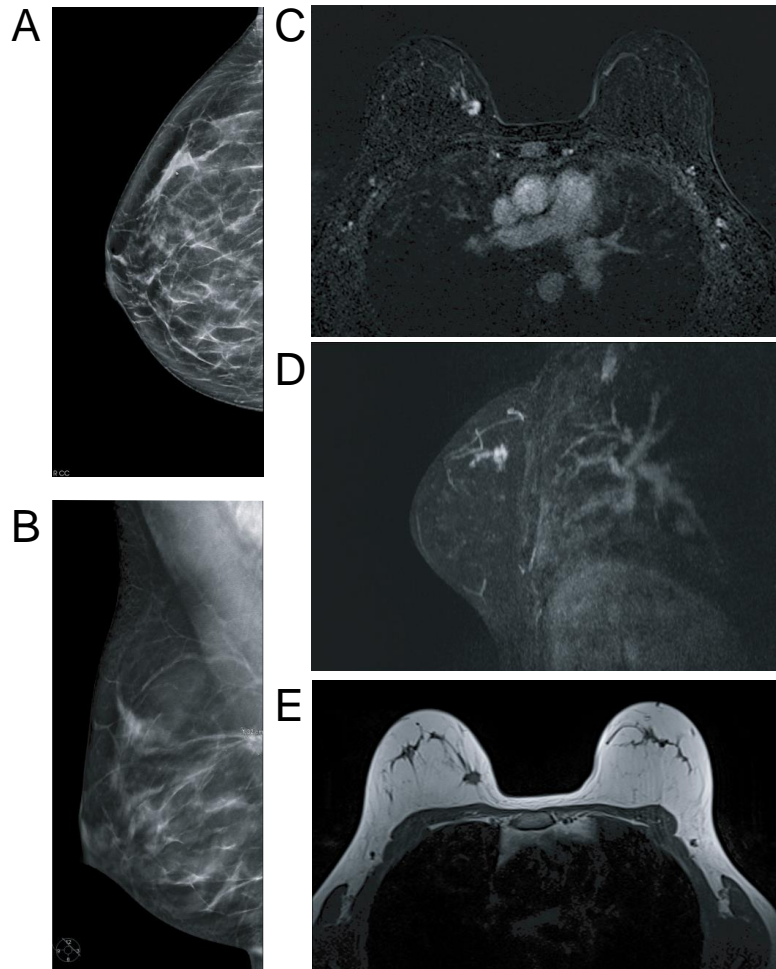

**Figure S3. Diagnostic images of the PPBC from case #15 right breast. (A, B)** mediolateral oblique projection of a mammogram of the right breast with an irregular and infracentimetric microlobulated nodule in the prepectoral region. **(C-D)** Magnetic resonance imaging of the breast with dynamic study in the axial and sagittal plane **(C and E)**, showing a hypointense nodule, with a rounded morphology, spiculated and infracentimetric margins in morphological sequences **(T1, panel D)** with early uptake type mass, suspicious for malignancy.
